# Supplementary figures and images for: Large-scale R2R fabrication of piezoresistive films (Ni/PDMS) with enhanced through thickness electrical and thermal properties by applying a magnetic field
Source: Royal Society of Chemistry journal article supplement (doi:10.1039/c5ra17005b), 2015-01-01

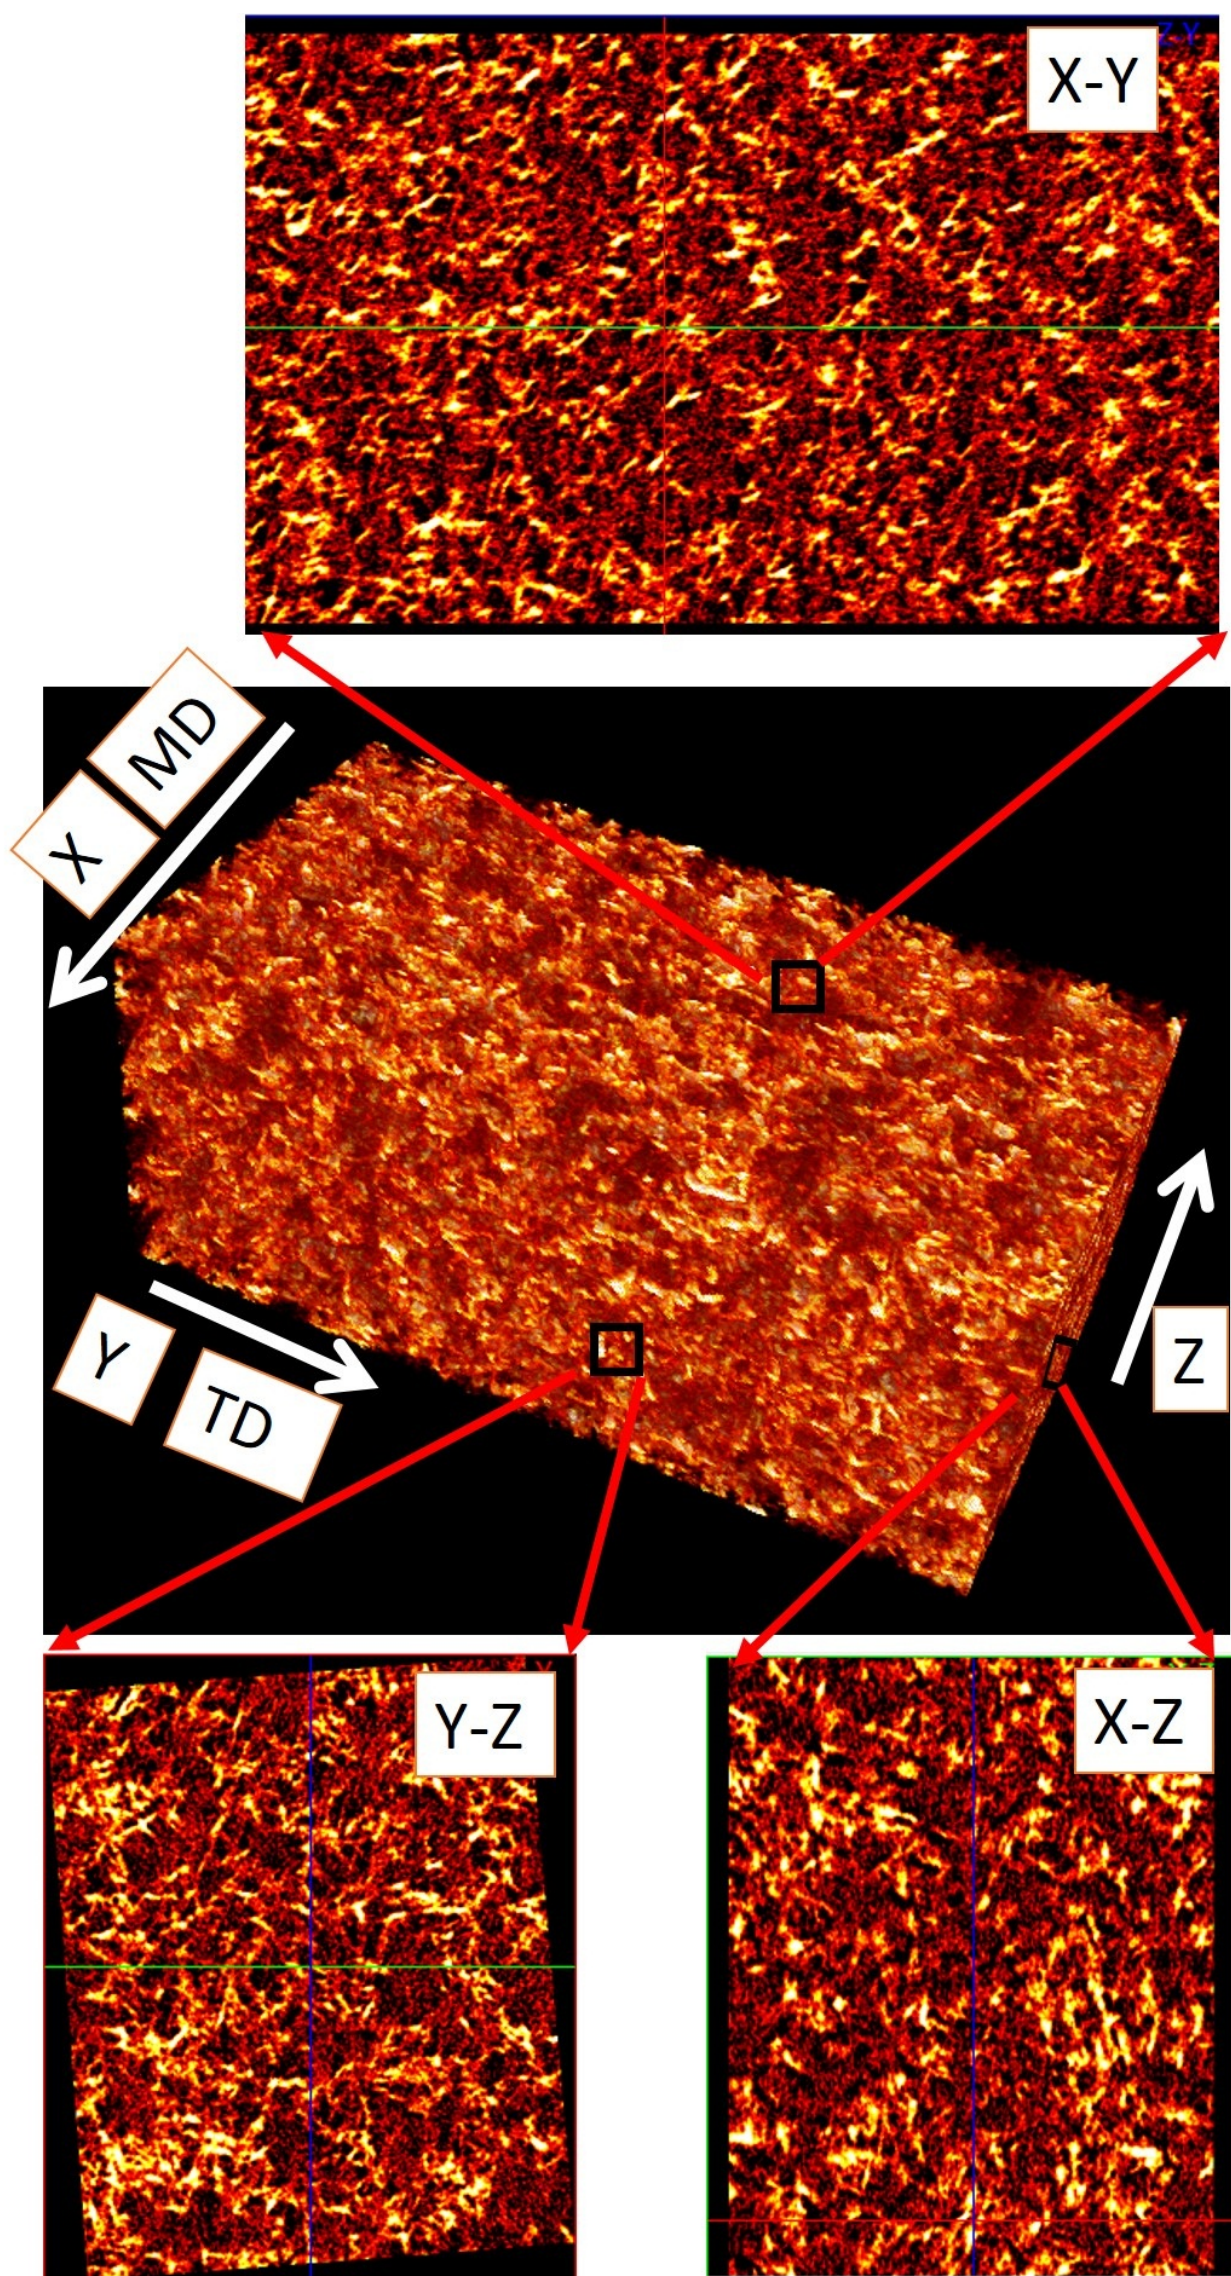

Supplement: c5ra17005b3.pdf [file c5ra17005b3.pdf]
